# Supplementary material
Source: publisher figshare collection journal article supplement (https://karger.figshare.com/ndownloader/files/12953744)
Supplement: Supplementary file 1 [file 12953744]

**Supplementary Table 1.** Correlations between complete blood count and estimates

| Cells | Correlation between CBC and estimates* |
| --- | --- |
| Lymphocytes | 0.87 |
| Granulocytes | 0.88 |
| Monocytes | 0.69 |
| Natural Killer cells | 0.68 |
| B cells | 0.61 |
| CD4 T cells | 0.83 |
| CD8 T cells | 0.85 |

* CBC = complete blood count; estimates = abundance measures of cell types estimated by Horvath’s

epigenetic clock software

**Supplementary Figure 1.** Scatterplot of epigenetic age by chronological age in total sample (N=160)

**Epigenetic age**

**PTSD status**


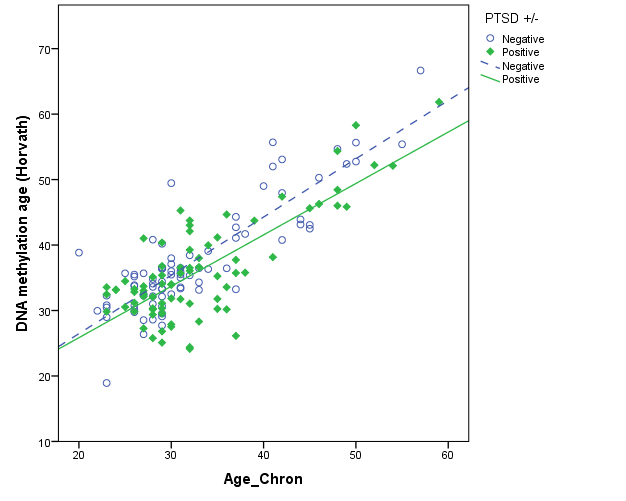


**Chronological age**

**Supplementary Figure 2.** Scatterplot of epigenetic age at baseline and at follow-up (N=44)

**epigenetic age at follow-up**


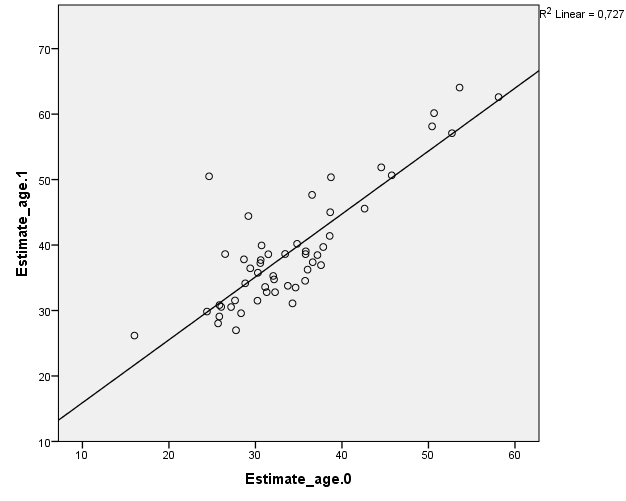


**epigenetic age at baseline**

**Supplementary Figure 3.** Scatterplot of ∆age at baseline and at follow-up (N=44)


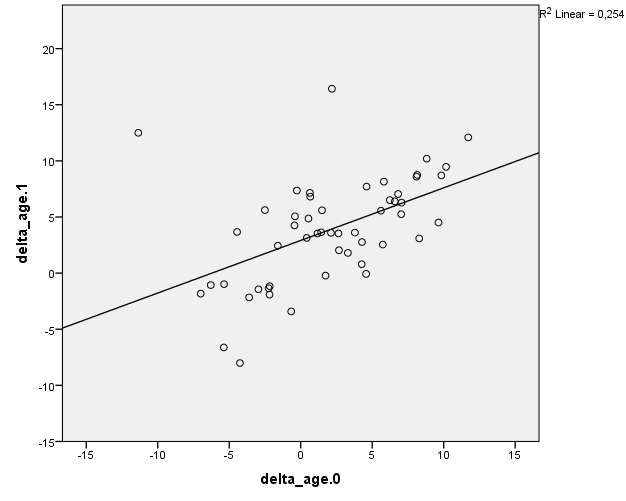


**∆age at follow-up**

**∆age at baseline**
